# Supplementary material for: Tracing CRISPR/Cas12a Mediated Genome Editing Events in Apple Using High-Throughput Genotyping by PCR Capillary Gel Electrophoresis
Source: MDPI journal article supplement (doi:10.3390/ijms222212611), 2021-11-22
Supplement: s1 [file s1]

## Supplementary Material

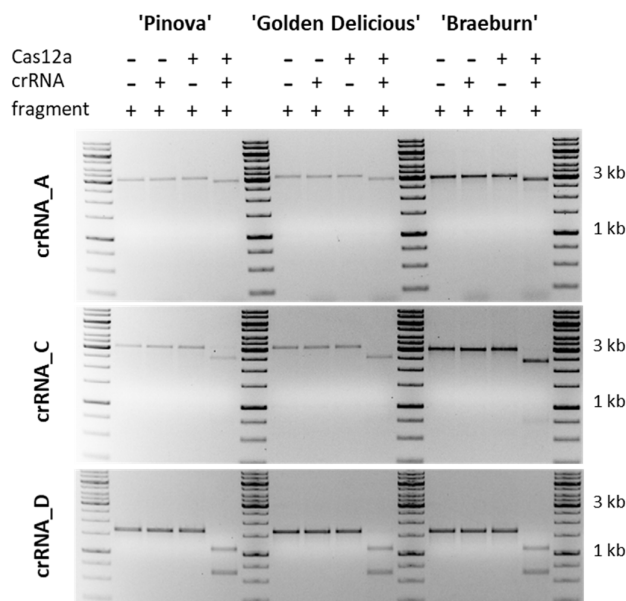

**Figure S1.** Analysis of cleavage efficiency of crRNAs on different apple genotypes. PCR fragments amplified from different apple cultivars ('Pinova', 'Golden Delicious', 'Braeburn') were used as substrate for *in vitro* cleavage reactions in combination with different crRNAs pre-assembled with *LbCas12a* (Figure 1). The use of crRNA\_A, C and D resulted in full digestion of the DNA substrate of each genotype.

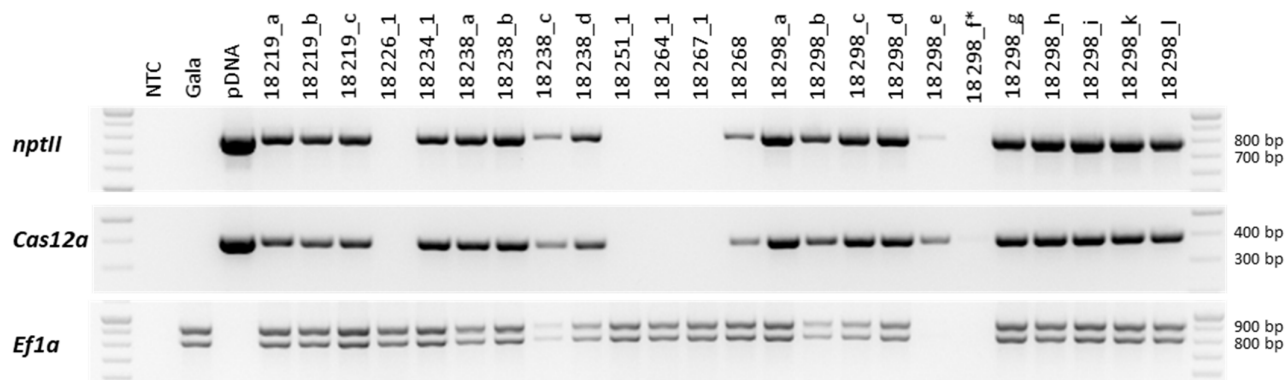

**Figure S2.** Detection of transgenic *nptII* and *LbCas12a* sequences in albino shoots. PCR using *nptII* and *LbCas12a* specific primer pair were performed to analyze several albino shoots. The plasmid p9oN-U10LbCpf1-Ex27 (pDNA), the genomic DNA of 'Gala' as well as no template control (NTC) were performed as PCR controls. Using a universal primer pair amplifying *Ef1a* sequences, each DNA sample was tested for their usability as PCR template.

**Table S1:** DNA and RNA oligonucleotides. The sequence of the oligonucleotides used as crRNA or DNA primer for PCR amplification, respectively, is given. The 23 bp target-specific sequence of the respective crRNA is underlined. Fluorescent 5'-labels of the PCR primers are indicated.

| oligo name | 5'-label | 5'-sequence-3'                                                    |
|------------|----------|-------------------------------------------------------------------|
| guide RNA: |          |                                                                   |
| crRNA_A    |          | UAA UUU CUA CUA AGU GUA GAU <u>CGA GCC UCU CCU CGU CCA ACC AA</u> |
| crRNA_C    |          | UAA UUU CUA CUA AGU GUA GAU <u>GCA UUG CAA AUA UCA UAG AAU GU</u> |
| crRNA_D    |          | UAA UUU CUA CUA AGU GUA GAU <u>UAG CCA UGU CAA AGG CCC UUA AC</u> |

**PCR primer:**


---

|            |         |                               |
|------------|---------|-------------------------------|
| EX1-FW     |         | AGG AAT GGT GTT TGC CCC TT    |
| EX6-REV    |         | AAC ATA AGC CTG CCC ACC AA    |
| EX6-FW     |         | TGT TGA AGC CCA AGA TGG CT    |
| EX8-REV    |         | GTG GCG AAC ACA TAC GCA TC    |
| A-FW       |         | TGG CAT AGG TTG TTT GCG TTG   |
| A-FW       | 6-FAM   | TGG CAT AGG TTG TTT GCG TTG   |
| A-REV      |         | TAA AGT TAG AGC GGC CGA AAA C |
| D-FW       |         | TTT TGG TGA TTC GCA GGC CA    |
| D-REV      |         | GGT GCA CAT GAA GCC ATA ACA T |
| D-REV      | Atto532 | GGT GCA CAT GAA GCC ATA ACA T |
| EF1a-FW    |         | ATT GTG GTC ATT GGY CAY GT    |
| EF1a-REV   |         | CCA ATC TTG TAV ACA TCC TG    |
| nptIIopt_F |         | AGC ATG GAT TGA GCA GGA       |
| nptIIopt_R |         | ATG ATG TTG GGG AGG CAG       |
| Cas12a-FW  |         | CCA GTA TCG CTT TTC GCT GC    |
| Cas12a-REV |         | CTC CTC GTC GGA TGT GTA GC    |

---
